# Supplementary material for: Anti-CandidaProperties of Urauchimycins from Actinobacteria Associated withTrachymyrmexAnts
Source: Hindawi journal article supplement (doi:10.1155/2013/835081), 2013-01-01
Supplement: f1 [file 835081.f1.pdf]

1 **SUPPLEMENTARY MATERIAL**

2 Submitted to *BioMed Research International* - Special Issue "Actinomycetes: Role in  
3 Biotechnology and Medicine"

4

5 **Anti-*Candida* properties of urauchimycins from actinobacteria associated with**  
6 ***Trachymyrmex* ants**

7

8 Thais D. Mendes, Warley S. Borges, Andre Rodrigues, Scott E. Solomon, Paulo C. Vieira, Marta  
9 C. T. Duarte, Fernando C. Pagnocca

10

11 Contents:

12

13 Table S1. Actinobacteria strains used in the present study.

14

15 Figure S1.  $^1\text{H}$  NMR of Urauchimycin A ( $\text{CDCl}_3$ , 400 MHz).

16

17 Figure S2.  $^1\text{H}$  NMR of Urauchimycin B ( $\text{CDCl}_3$ , 400 MHz).

18

19

20

21

22

23

24

25  
26  
27  
28  
29  
30  
31  
32  
33  
34

35 Table S1. Actinobacteria strains used in the present study

| Colony Id     | Worker <sup>1</sup> | Isolate Id | Ant                     | Collection site                             | GPS                            |
|---------------|---------------------|------------|-------------------------|---------------------------------------------|--------------------------------|
| CTL080820-02  | A                   | TD016      | <i>Trachymyrmex</i> sp. | Estação Ecológica do Panga, Uberlândia – MG | S 19°17.291'<br>W 48°39.670'   |
| CTL080820-02  | B                   | TD017      | <i>Trachymyrmex</i> sp. | Estação Ecológica do Panga, Uberlândia – MG | S 19°17.291'<br>W 48°39.670'   |
| ARTD080903-01 | B                   | TD018      | <i>Trachymyrmex</i> sp. | UNESP, Rio Claro – SP <sup>2</sup>          | S 10° 23.766'<br>W 48° 21.700' |
| ARTD080903-02 | A                   | TD019      | <i>Trachymyrmex</i> sp. | UNESP, Rio Claro – SP                       | S 10° 23.766'<br>W 48° 21.700' |
| ARTD080903-02 | B                   | TD020      | <i>Trachymyrmex</i> sp. | UNESP, Rio Claro – SP                       | S 10° 23.766'<br>W 48° 21.700' |
| ARTD080903-02 | C1                  | TD021      | <i>Trachymyrmex</i> sp. | UNESP, Rio Claro – SP                       | S 10° 23.766'<br>W 48° 21.700' |
| ARTD080903-02 | C2                  | TD022      | <i>Trachymyrmex</i> sp. | UNESP, Rio Claro – SP                       | S 10° 23.766'<br>W 48° 21.700' |
| ARTD080903-02 | C3                  | TD023      | <i>Trachymyrmex</i> sp. | UNESP, Rio Claro – SP                       | S 10° 23.766'                  |

| Colony Id     | Worker <sup>1</sup> | Isolate Id | Ant                     | Collection site                             | GPS           |
|---------------|---------------------|------------|-------------------------|---------------------------------------------|---------------|
|               |                     |            |                         |                                             | W 48° 21.700' |
| ARTD080903-03 | A                   | TD025      | <i>Trachymyrmex</i> sp. | UNESP, Rio Claro – SP                       | S 10° 23.766' |
|               |                     |            |                         |                                             | W 48° 21.700' |
| ARTD080903-03 | D                   | TD027      | <i>Trachymyrmex</i> sp. | UNESP, Rio Claro – SP                       | S 10° 23.766' |
|               |                     |            |                         |                                             | W 48° 21.700' |
| ARTD080903-04 | A                   | TD028      | <i>Trachymyrmex</i> sp. | UNESP, Rio Claro – SP                       | S 10° 23.766' |
|               |                     |            |                         |                                             | W 48° 21.700' |
| ARTD080903-04 | B                   | TD030      | <i>Trachymyrmex</i> sp. | UNESP, Rio Claro – SP                       | S 10° 23.766' |
|               |                     |            |                         |                                             | W 48° 21.700' |
| SES080909-08  | A                   | TD032      | <i>Trachymyrmex</i> sp. | Fazenda São Bento, Miranda – MS             | S 19° 50.146' |
|               |                     |            |                         |                                             | W 57° 01.016' |
| SES080911-04  | A1                  | TD033      | <i>Trachymyrmex</i> sp. | Fazenda São Bento, Miranda – MS             | S 19° 57.612' |
|               |                     |            |                         |                                             | W 56° 99.019' |
| SES080911-04  | A2                  | TD034      | <i>Trachymyrmex</i> sp. | Fazenda São Bento, Miranda – MS             | S 19° 57.612' |
|               |                     |            |                         |                                             | W 56° 99.019' |
| SES080911-06  | A                   | TD035      | <i>Trachymyrmex</i> sp. | Fazenda São Bento, Miranda – MS             | S 19° 49.474' |
|               |                     |            |                         |                                             | W 56° 01.079' |
| SES080921-03  | A                   | TD045      | <i>Trachymyrmex</i> sp. | Estação Ecológica do Panga, Uberlândia – MG | S 19° 17.291' |
|               |                     |            |                         |                                             | W 48° 39.670' |
| SES080921-03  | B                   | TD047      | <i>Trachymyrmex</i> sp. | Estação Ecológica do Panga, Uberlândia – MG | S 19° 17.291' |
|               |                     |            |                         |                                             | W 48° 39.670' |
| SES080922-03  | C                   | TD049      | <i>Trachymyrmex</i> sp. | Estação Ecológica do Panga, Uberlândia – MG | S 19° 17.291' |
|               |                     |            |                         |                                             | W 48° 39.670' |
| SES080922-03  | D                   | TD050      | <i>Trachymyrmex</i> sp. | Estação Ecológica do Panga, Uberlândia – MG | S 19° 17.291' |
|               |                     |            |                         |                                             | W 48° 39.670' |
| SES080924-01  | A1                  | TD051      | <i>Trachymyrmex</i> sp. | Estação Ecológica do Panga, Uberlândia – MG | S 19° 17.291' |
|               |                     |            |                         |                                             | W 48° 39.670' |
| SES080924-01  | A2                  | TD053      | <i>Trachymyrmex</i> sp. | Estação Ecológica do Panga, Uberlândia – MG | S 19° 17.291' |
|               |                     |            |                         |                                             | W 48° 39.670' |
| SES080924-01  | B                   | TD055      | <i>Trachymyrmex</i> sp. | Estação Ecológica do Panga, Uberlândia – MG | S 19° 17.291' |

| Colony Id    | Worker <sup>1</sup> | Isolate Id | Ant                     | Collection site                             | GPS          |
|--------------|---------------------|------------|-------------------------|---------------------------------------------|--------------|
|              |                     |            |                         |                                             | W 48°39.670' |
| SES080924-02 | B                   | TD058      | <i>Trachymyrmex</i> sp. | Estação Ecológica do Panga, Uberlândia – MG | S 19°17.291' |
|              |                     |            |                         |                                             | W 48°39.670' |

36 <sup>1</sup> Letters refers to an ant worker from which we isolated actinobacteria. Letters followed by numbers indicate that  
37 more than one actinobacteria was isolated from the same worker.

38 <sup>2</sup> UNESP: São Paulo State University; SP: São Paulo State; MS: Mato Grosso do Sul State; MG: Minas Gerais State

39

40

41

42

43

44

45

46

47 Fig. S1.

48

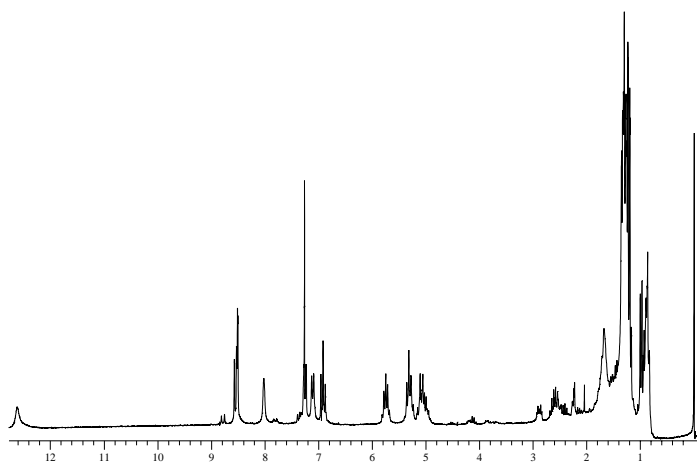

49

50

51

52

53 Fig. S2.

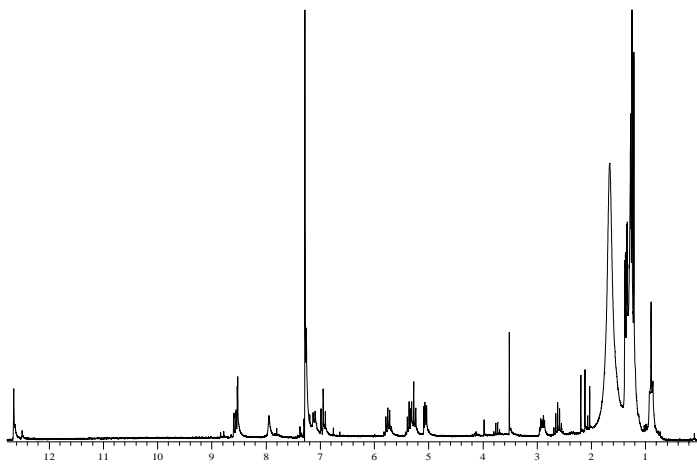

54

55

56
